1 Selection of Sites for Field Trials of Genetically Engineered Mosquitoes  
2 with Gene Drive.

3

4 Lanzaro G.C.<sup>1, \*</sup>, Campos M.<sup>1</sup>, Crepeau M.<sup>1</sup>, Cornel A.<sup>1</sup>, Estrada A.<sup>1</sup>, Gripkey H.<sup>1</sup>,  
5 Haddad Z.<sup>2</sup>, Kormos A.<sup>1</sup>, Palomares S.<sup>1</sup> and Sharpee W.<sup>1</sup>

6 <sup>1</sup>Vector Genetics Laboratory, Department of Pathology, Microbiology and Immunology,  
7 School of Veterinary Medicine, University of California, Davis, CA

8 <sup>2</sup>California Institute of Technology, Jet Propulsion Laboratory, Pasadena, CA

9 \*Corresponding author

10 **Keywords:** malaria, *Anopheles gambiae*, genetic control, islands, population  
11 modification,

12

13 **Abstract:** Novel malaria control strategies using genetically engineered mosquitoes  
14 (GEMs) are on the horizon. Population modification is one approach wherein  
15 mosquitoes are engineered with genes rendering them refractory to the malaria  
16 parasite coupled with a low-threshold, Cas9-based gene drive. When released into a  
17 wild vector population, GEMs preferentially transmit these beneficial genes to their  
18 offspring, ultimately modifying a vector population into a non-vector one. Deploying  
19 this technology awaits evaluation including ecologically contained field trials. Here, we  
20 consider a process for site selection, the first critical step in designing a trial. Our goal is

21 to identify a site that maximizes prospects for success, minimizes risk, and serves as a fair,  
22 valid, and convincing test of efficacy and impacts of a GEM product intended for  
23 large-scale deployment in Africa. We base site selection on geographical, geological,  
24 and biological, rather than social or legal, criteria. We recognize the latter as critically  
25 important but not preeminent. We propose physical islands as being the best  
26 candidates for a GEM field trial and present an evaluation of 22 African islands. We  
27 consider geographic and genetic isolation, biological complexity, island size,  
28 topography, and identify two island groups that satisfy key criteria for ideal GEM field  
29 trial sites.

30

## 31 **1. Introduction**

32 We present a framework employed by the University of California Irvine Malaria  
33 Initiative (UCIMI) for the selection of sites to conduct field trials of a genetically  
34 engineered mosquito (GEM) with gene drive. These GEMs are designed to offer safe,  
35 cost-effective, and sustainable malaria control in sub-Saharan Africa. This will be  
36 achieved using a population modification strategy [1] wherein parasite blocking  
37 effector genes are engineered into vector mosquitoes, rendering them incapable of  
38 transmitting the parasite [2]. An essential GEM component is an efficient gene drive [3]  
39 which serves two critical purposes: to establish the effector genes at high frequency in  
40 the mosquito population at the immediate release site and to facilitate its spread into

41 neighboring populations via normal mosquito dispersal and gene flow. This GEM is  
42 designed to eliminate the malaria parasite without eliminating the mosquito.

43 Achieving malaria control on a large spatial scale, requires a so-called low-threshold  
44 gene drive; meaning one with a maximum capability for spreading across the  
45 environment (invasiveness). Henceforth, when we refer to a GEM, we mean a mosquito  
46 engineered with anti-*Plasmodium* effector genes and a low threshold, highly invasive  
47 gene drive. This is the GEM that UCIMI aims to evaluate in a field trial.

48 Our primary goal for a site selection process is identification of a site that maximizes  
49 the prospects for success, minimizes risk, and serves as a fair, valid, and convincing test  
50 of the efficacy and impacts of a GEM product intended for large-scale deployment in  
51 sub-Saharan Africa. The purpose of the field trial itself is to describe the behavior of a  
52 GEM when introduced into a natural population of a target species, in this case  
53 *Anopheles gambiae* and/or its sister species *Anopheles coluzzii*.

54 A multi-phase pathway for the development and evaluation of GEMs has been  
55 proposed by the World Health Organization (WHO) [4]. This protocol has been widely  
56 endorsed [5, 6] and serves as the foundation for the framework described here. PHASE 1  
57 of the WHO pathway includes design and construction of the GEM product and initial  
58 evaluation of its efficacy. This evaluation assesses the phenotype generated by the  
59 transgenes, transgene inheritance (especially as it relates to the efficiency of the gene  
60 drive component), the stability of the construct over time, and a rudimentary

61 evaluation of overall fitness [3, 7]. GEM products that show promise then move into  
62 PHASE 2 field trials with a strong emphasis on containment.

63 Early guidelines recommended that initial tests be conducted in large, artificially  
64 contained greenhouse-like cages designed to simulate natural conditions [8-11]. Data  
65 generated in such caged environments are limited in several important ways: they do  
66 not allow analysis of community and ecosystem-level interactions in any meaningful  
67 sense, they cannot replicate food web structure, and they do not permit examination  
68 of ecological phenomenon (e.g., dispersal) across spatial scales [12, 13]. Critically,  
69 experiments conducted in artificial environments often yield highly replicable, but  
70 spurious results [14]. These limitations were recognized in later guidelines and the use of  
71 artificially contained environments is now suggested as optional, unless required by  
72 regulatory authorities [15, 16].

73 A different strategy that has been proposed for dealing with containment is to  
74 conduct field trials in a stepwise fashion with early trials using high-threshold drives, such  
75 as split-drive systems which have limited invasiveness and are therefore self-contained  
76 [17, 18]. Threshold-dependent drives have their place in controlling vectors on a small  
77 spatial scale, such as in urban settings [19]; however, deploying a high threshold drive  
78 to achieve malaria control at the scale of continental Africa is not feasible [15].

79 From our perspective, conducting trials in large cages or with high-threshold drives  
80 does not satisfy our goal that field tests be valid and convincing. Therefore, we propose

81 to use ecologically confined PHASE 2 field trials in their place. The issue of containment  
82 can be mitigated by selecting the appropriate site.

83 The first consideration in the selection of a GEM field site should be based on  
84 defining biological and physical characteristics that would make a site ideal, or as near  
85 to ideal, as possible [8, 11, 20]. Ethical, social, and legal issues are critically important,  
86 and no field test can be undertaken before these are addressed [21-23]. However,  
87 valuable resources, relationships, and infrastructure are best developed at a site that  
88 has been determined to be scientifically suitable. Here we describe a set of criteria that  
89 may be applied to a thoughtful consideration and assessment of potential field trial  
90 sites. When completed, this framework should provide a cogent justification for why a  
91 particular site was selected for GEM testing.

92 Ecologically confined field sites offer geographical, environmental, and/or  
93 biological confinement [4]. Physical islands have been suggested as ideal for  
94 conducting GEM field trials [6, 11]. In addition to containment, islands have numerous  
95 characteristics that favor their use as GEM field trial sites, including relatively small size,  
96 distinct boundaries, simplified biotas, and relative geological youth. These features led  
97 to the development of the "Dynamic Equilibrium Theory of Island Biogeography" [24-27],  
98 which we rely on to inform our assessment of the advantages of island over mainland  
99 sites for the evaluation of GEM.

100

## 101 2. Materials and methods

### 102 (a) Selection of candidate island sites

103 Site selection was initiated with the identification of all potential island sites, which  
104 we define broadly as any island associated with the continent of Africa (Figure 1).

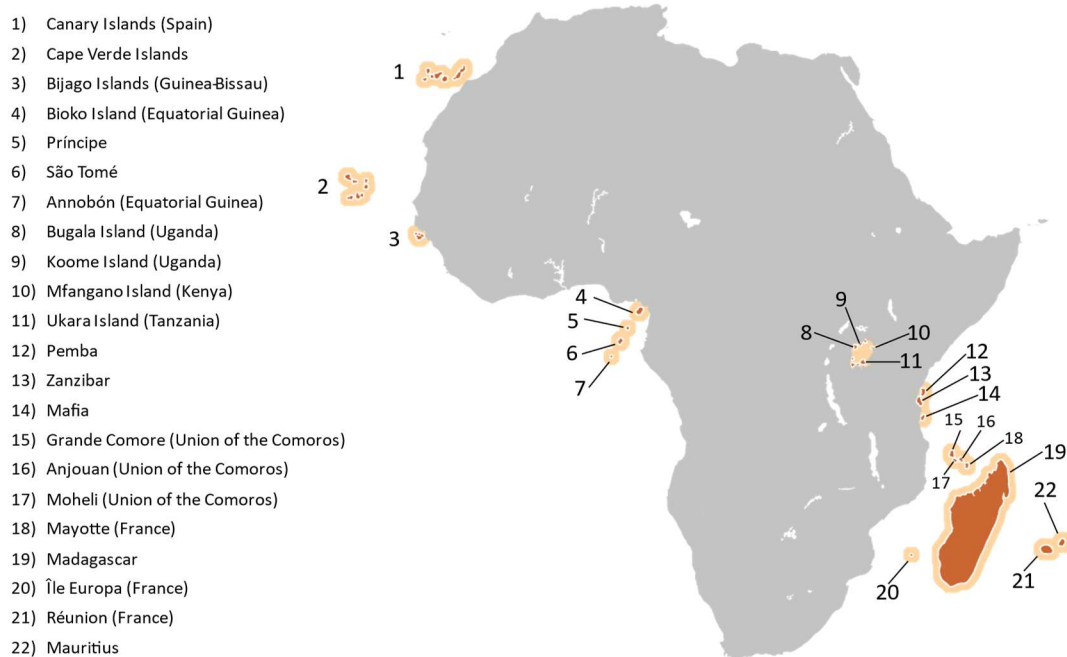

105  
106 **Figure 1.** African islands and island groups considered potential field sites for genetically  
107 engineered mosquitoes for malaria eradication.

108

109 Data for each site was obtained from published sources except for some genetic  
110 data which was generated *de novo* by us. These data were used to inform the  
111 suitability of potential sites by determining if they meet the set of criteria listed in Box 1.  
112 This information includes descriptions of entomological, genetic, geographic, and  
113 geophysical features of the sites and mosquito populations therein.

| <b>BOX 1. Criteria for the selection of field sites.</b>     |                                          |
|--------------------------------------------------------------|------------------------------------------|
| <b>Primary Criteria</b>                                      | <b>Rationale</b>                         |
| 1. Presence of <i>Anopheles gambiae</i> / <i>A. coluzzii</i> | Major vector; target of GEM production   |
| 2. Geographic isolation                                      | Containment of GEMs                      |
| 3. Genetic isolation                                         | Containment of transgene constructs      |
| 4. Genetic diversity                                         | Potential detriment to GEM function      |
| 5. Island size                                               | Feasibility vs. validity                 |
| 6. Topography                                                | Evaluation of GEM dispersal capacity     |
| 7. Anopheline species richness                               | Logistics; HGT*; confound epi. endpoints |
| <b>Other considerations</b>                                  | <b>Rationale</b>                         |
| 1. Insecticide susceptibility/resistance                     | Match GEM to indigenous mosquitoes       |
| 2. <i>Plasmodium</i> prevalence                              | Estimation of epidemiological impact     |
| 3. Presence of endangered species                            | Potential for negative GEM interactions  |
| 4. Travel feasibility                                        | Operational logistics and cost           |

114 \*HGT=horizontal gene transfer

115

## 116 (b) Measuring Island Geographic Isolation

117 Geographic isolation for each island was defined using three methods, all reported in  
 118 Table 1. The first is simply the geographic distance to the nearest mainland. Distances  
 119 for individual islands were calculated as the shortest great circular distance between  
 120 an island's mass centroid and the mainland coast. For archipelagos, distances from the  
 121 nearest island to the mainland were used [28]. Distance to the mainland for each Lake  
 122 Victoria island and for Annobón was determined using Google Earth's distance and  
 123 area measuring tool. The two closest points on the mainland and island shores were  
 124 used as measuring points. The significance of distance to mainland is that the nearest  
 125 mainland is assumed to be the richest gene pool and the source of populations on the  
 126 islands [28, 29].

127 **Table 1.** Bioclimatic and isolation index values used for the evaluation of potential island  
 128 field sites. DD = decimal degrees; UNEP = United Nations Environment Programme; SLMP  
 129 = Surrounding Landmass Proportion; GMMC = Glacial Maximum Mainland Connection  
 130 a proxy variable for island geological history which indicates whether an island was  
 131 connected to the mainland during the Last Glacial Maximum (LGM) (1 = true and 0 =  
 132 false); - refers to missing or incomplete data. Additional data sources: Bugala:[30-33];  
 133 Mfango [34]; Ukara: [35-37]; Koome [38-42]

| Island         | Archipelago        | Island type | Area (km <sup>2</sup> ) | Distance to mainland (km) | UNEP Isolation Index | SLMP  | GMMC | Elevation max (m) |
|----------------|--------------------|-------------|-------------------------|---------------------------|----------------------|-------|------|-------------------|
| Canary Islands | Canary Islands     | Oceanic     | 7509.66                 | 116.63                    | 30.4                 | 0.812 | 0    | 3705              |
| Cape Verde     | Cape Verde Islands | Oceanic     | 4088.52                 | 586.53                    | 55                   | 0.466 | 0    | 2813              |
| Bijagos        | Bijagos Islands    | Continental | 1944.72                 | 0.83                      | 10.8                 | 1.123 | 1    | 59                |
| Bioko          | Cameroon Line      | Continental | 1950.46                 | 73.03                     | 17                   | 1.148 | 1    | 3011              |
| Annobón        | Cameroon Line      | Oceanic     | 15.7                    | 350                       | 45                   | -     | 0    | 587               |
| São Tomé       | Cameroon Line      | Oceanic     | 854.8                   | 283.63                    | 39                   | 0.753 | 0    | 1977              |
| Príncipe       | Cameroon Line      | Oceanic     | 143.16                  | 221.72                    | 39                   | 0.86  | 0    | 934               |
| Bugala         | Lake Victoria      | Lacustrine  | 296                     | 3.7                       | 5.487                | -     | 1    | 160               |
| Koome          | Lake Victoria      | Lacustrine  | 100                     | 14.3                      | 10.688               | -     | 1    | 180               |
| Mfangano       | Lake Victoria      | Lacustrine  | 66                      | 7.4                       | 10.414               | -     | 1    | 551               |
| Ukara          | Lake Victoria      | Lacustrine  | 80                      | 22.8                      | 15.623               | -     | 1    | 162               |
| Pemba          | Zanzibar           | Continental | 987.08                  | 68.6                      | 31.231               | 1.178 | 0    | 149               |
| Zanzibar       | Zanzibar           | Continental | 1591.5                  | 50.9                      | 17                   | 1.337 | 1    | 133               |
| Mafia          | Mafia              | Continental | 443.24                  | 36.06                     | 29.432               | 1.194 | 1    | 66                |
| Grand Comore   | Comoros            | Oceanic     | 1021.61                 | 307.45                    | 49                   | 0.736 | 0    | 2368              |
| Moheli         | Comoros            | Oceanic     | 212.09                  | 340.61                    | 49                   | 0.754 | 0    | 793               |
| Anjouan        | Comoros            | Oceanic     | 432.08                  | 417.78                    | 49                   | 0.706 | 0    | 1591              |
| Mayotte        | Comoros            | Oceanic     | 371.42                  | 490.16                    | 47                   | 0.669 | 0    | 636               |
| Madagascar     | Madagascar         | Oceanic     | 590547.4                | 780.51                    | 58                   | 0.46  | 0    | 2876              |
| Ile Europa     | French Territory   | Oceanic     | 32.64                   | 492.95                    | 67.941               | 0.736 | 0    | 20                |
| Réunion        | Mascarene Islands  | Oceanic     | 2512.65                 | 1699.32                   | 73                   | 0.467 | 0    | 3066              |
| Mauritius      | Mascarene Islands  | Oceanic     | 1868.44                 | 1874.49                   | 87                   | 0.399 | 0    | 816               |

134

135 A second metric is the United Nations Environment Programme (UNEP) Isolation  
 136 Index, which is calculated as "the sum of the square roots of the distances to the  
 137 nearest equivalent or larger island, the nearest group or archipelago, and the nearest  
 138 continent [43]." The higher the value, the more geographically isolated the island is.



139           The third isolation index is Surrounding Land Mass Proportion (SLMP) where the  
140 isolation of the focal island is proportional to the area of the surrounding landmass [28].  
141 SLMP is calculated as the sum of the proportions of landmass within buffer distances of  
142 100, 1000, and 10,000 km around the island perimeter. SLMP accounts for the coastline  
143 shape of large landmasses by considering only regions that extend into the measured  
144 buffers. SLMP values for the Canary Islands, Cape Verde Islands, and Bijagós Islands  
145 were represented as the average of all islands in their respective archipelagos [28].  
146 SLMP is a preferred index for analysis of species variation on a focal island. The  
147 equilibrium theory of island biogeography supports this index as individual islands may  
148 act as stepping-stones for species dispersal and establishment, which this index  
149 accounts for by shortening the distance between an island and potential source  
150 populations [26]. A larger SLMP value indicates that an island is surrounded by more  
151 landmass. For this study, we are focusing on islands with a lower SLMP value since these  
152 islands will have less surrounding landmass which could facilitate mosquito dispersal into  
153 or out of the target island.

### 154           **(c) Island size and topography**

155           Island size information, presented in Table 1 as area, is taken from the publication by  
156 Weigelt et al. [28]. They describe island size by using the Database of Global  
157 Administrative Areas (GADM) to obtain high-resolution island polygons. Area was  
158 calculated for each GADM polygon in a cylindrical equal area projection. Areas for  
159 archipelagos (Canary Islands, Bijagos, Cape Verde) were reported here as the sum of  
160 all islands in each archipelago [28]. The area for Annobón was obtained from the

161 United Nations Environmental Programme [43]. The areas for the Lake Victoria islands  
162 (excluding Koome) were taken from the literature [33-35] and the area for Koome  
163 Island was approximated using Google Earth's distance and area measuring tool.

164 Elevation maximum and minimum of each island were obtained from the AW3D30  
165 Global Digital Surface Model of the Japan Aerospace Exploration Agency [44]. GeoTIFF  
166 files were downloaded, and the highest elevation of each island/archipelago was  
167 identified. Island topography was further described using the United States National  
168 Aeronautics and Space Administration (NASA) 90-m resolution elevation data from the  
169 Shuttle Radar Topography Mission (SRTM) 90m Digital Elevation Model database [45]. In  
170 this case, altitude and magnitude of steepest gradient measurements were used to  
171 generate heat maps as graphic descriptors of topography.

#### 172 **(d) Population genomics analyses**

173 We conducted a comparative genomics analysis of mainland and island  
174 populations of the two target species. The locations and sample sizes per site are  
175 provided in Figure 2. In total, 420 individual *Anopheles gambiae* and *A. coluzzii* genome  
176 sequences were analyzed in this study. The UC Davis Vector Genetics Laboratory (VGL)  
177 generated 167 genomes (Supplemental Table 1). In addition, 196 genomes were  
178 obtained from the *Anopheles gambiae* 1,000 Genome Project phase 2 [46] and 57  
179 were taken from a published Lake Victoria islands study [47].

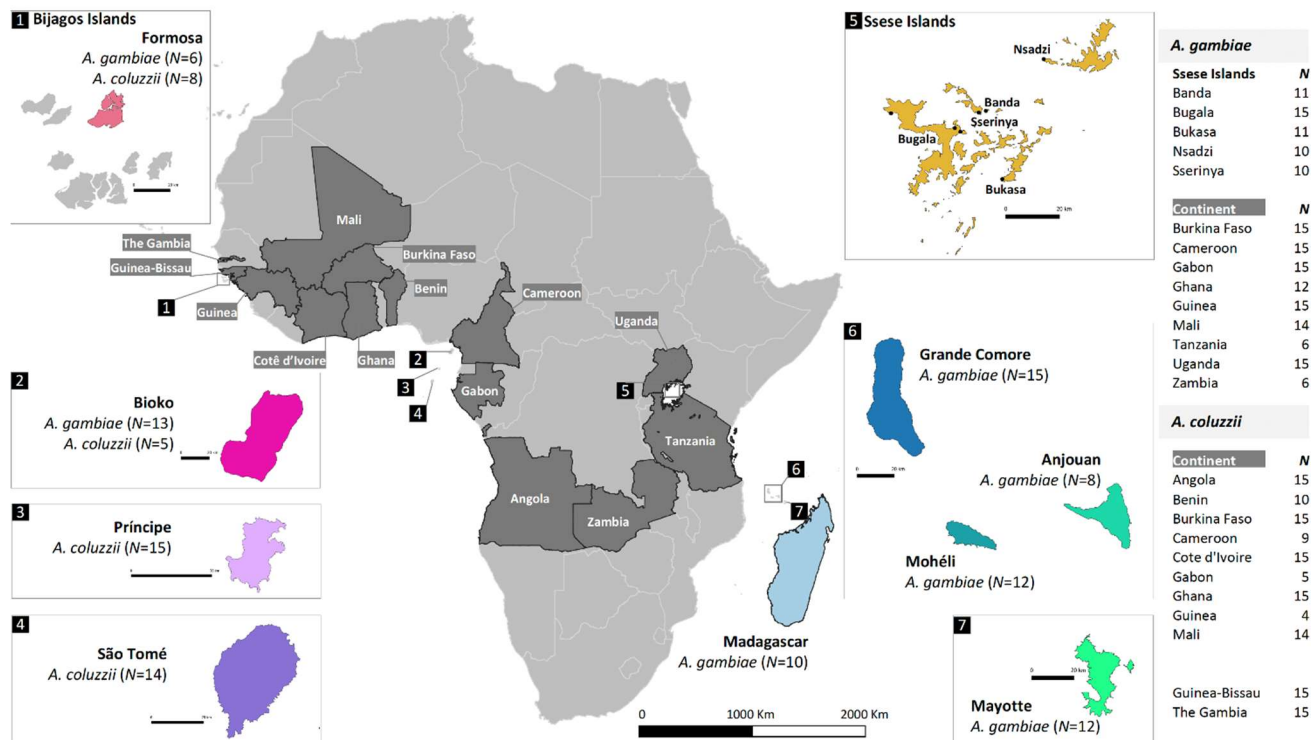

180  
 181 **Figure 2.** Study sampling locations. Samples of *A. gambiae* and *A. coluzzii* were from 12  
 182 countries (dark shade) in continental Africa: Angola, Benin, Burkina Faso, Cameroon,  
 183 Cotê d'Ivoire, Gabon, Ghana, Guinea, Tanzania, Uganda and Zambia. Populations  
 184 from Guinea-Bissau and The Gambia (dark shade) were included with no species  
 185 assignment. Table on the right displays the number of samples for each of the mainland  
 186 populations. The insert maps show African islands sampled in this study: 1) Formosa  
 187 islands within Bijagos archipelago; 2) Bioko, 3) Príncipe and São Tomé, 4) islands in the  
 188 Gulf of Guinea, 5) five islands in Ssesse islands in Lake Victoria in Uganda, 6) in the  
 189 Comoros (Anjouan, Mohéli and Grande Comore), and 7) Mayotte. Madagascar island  
 190 is shown in the main map. The number of samples included for each island is shown in  
 191 parenthesis. Insert maps contain a scale of 20km length.

192  
 193 Individual mosquito DNAs from the VGL samples were extracted using a Qiagen  
 194 Biosprint (Qiagen, Hilden, Germany) following our established protocol [48]. 10 ng of  
 195 genomic DNA was used for individual libraries using a KAPA HyperPlus Kit (Roche  
 196 Sequencing Solutions, Indianapolis, Indiana, USA), as described in Yamasaki et.al [49].

197 Sequencing was performed on an Illumina HiSeq 4000 instrument (Illumina, San Diego,  
198 California, USA) at the UC Davis DNA Technologies Core facility. Methods used for  
199 genome sequencing of individuals from other sources are described elsewhere [47, 50].

200 Demultiplexed raw reads of VGL samples were filtered and trimmed using  
201 Trimmomatic v0.36 [51] and saved as FastQ files. Sequences from Ag1000G and Lake  
202 Victoria study [47] were downloaded and converted to FastQ files using BEDTools v.2.2  
203 [52]. All specimens were mapped to the reference AgamP4 [53, 54] using BWA-MEM  
204 v0.7.15 [55] with default settings. Duplicate reads were removed using Sambamba  
205 markdup [56]. Freebayes v1.2.0 [57] was used for variant calling, with standard filters  
206 and the “-no-population-priors”, “theta = 0.01”, and “max-comple-gap = 0” options.  
207 Variants were normalized with *vt normalize* v0.5 [58].

208 SNPs were filtered out when they did not pass the accessibility mask from Ag1000G,  
209 missingness >10%, a minimum depth of 8 and minor allele frequency (MAF) < 1%. In  
210 addition, population structure analysis was based on chromosome 3 SNPs only. This was  
211 done to avoid confounding signals from polymorphic inversions on chromosomes 2 and  
212 X [53]. Heterochromatic regions on chromosome 3R (3R:38,988,757-41,860,198;  
213 3R:52,161,877-53,200,684) and 3L (3L:1-1,815,119; 3L:4,264,713-5,031,692) were also  
214 filtered out [53].

215 Description of population structure was performed by Principal component analysis  
216 (PCA) after pruning for LD using scikit-allel v1.2.0 [59]. Hudson's estimator [60, 61] was  
217 used for pairwise fixation indices  $F_{ST}$  calculation implemented in scikit-allel v1.2.0.

218 Nucleotide diversity ( $\pi$ ) was calculated in nonoverlapping windows of 10 kb on  
219 euchromatic regions of chromosome 3 using VCFtools [62]. The results were grouped by  
220 population and significance tests performed between the islands and mainland  
221 populations using a Wilcoxon rank-sum test in R.

#### 222 **(e) Anthropogenic sources of dispersal**

223 The prospects for a GEM emigrating out of a field trial site into a non-target site or  
224 vice versa by air or ship transport was assessed by determining the frequency of  
225 departures from select mainland and island sites. Airline flight data including the annual  
226 (Jan. 1-Dec. 31, 2019) number of international departures from airports within a specific  
227 country were obtained from CIRIUM, an aviation data analytics provider [63]. Similarly,  
228 shipping data for the annual (Jan.1-Dec.31, 2020) number of commercial ship  
229 departures was obtained from the [64].

#### 230 **(f) Anopheline species richness**

231 Published compilations of Afrotropical *Anopheles* species distributions [65, 66] were  
232 used to assemble the information for mainland and island countries. The first criterion for  
233 field site selection is the presence of the target species, which is in our case *Anopheles*  
234 *gambiae sensu stricto* and/or its sister species *Anopheles coluzzii*. Species are  
235 designated as primary or secondary vectors or as "other" if they are non-vectors or their  
236 status as vectors is not clear. Species that commonly had sporozoite infection rates  
237 above 1%, as determined by salivary gland dissections, CSP ELISA or PCR of head and  
238 thorax were listed as primary vectors. Species with infection rates of <1% were listed as

239 secondary vectors. Our knowledge of the population structure and biology of almost all  
240 the secondary vectors is limited and their role in malaria transmission varies from  
241 location to location.

242

### 243 **3. Results and discussion**

#### 244 **(a) Identification of potential field sites**

245 We evaluated 22 potential field sites, including 5 individual islands, multiple islands  
246 within 7 archipelagos and 4 islands within Lake Victoria (Figure 1). The sites identified  
247 include three island types: continental, oceanic, and lacustrine. Each type possesses  
248 features that impact its utility as a GEM trial site. Continental or land bridge islands are  
249 unsubmerged portions of the continental shelf and were, at one time, connected to  
250 the mainland. Oceanic islands arise from the ocean floor and were never connected  
251 to the mainland. Lacustrine islands are islands within lakes and are typically formed by  
252 deposits of sedimentary rock, as are the Lake Victoria islands. For comparison, our  
253 analyses include mainland sites closest to the islands and those in which GEM field trials  
254 are currently under consideration (e.g., Burkina Faso, Mali, Uganda). We then proceed  
255 by defining and justifying a prioritized set of criteria (Box 1) on which to base  
256 evaluations.

#### 257 **(b) Geographic isolation**

258 Geographic isolation is among the most significant features favoring islands as GEM  
259 field trial sites. Although some mosquito species are known to disperse on prevailing

260 winds over long distances [67, 68], there are, to our knowledge, no reliable reports of  
261 open-ocean wind dispersal of malaria vector species over the distances (hundreds of  
262 kilometers) separating some of the oceanic islands under consideration here.  
263 Emigration of GEMs out of the field trial site into neighboring, non-target sites, either on  
264 nearby islands or the mainland, pose a problem, especially as it relates to risk and  
265 regulatory concerns. Equally important is immigration of wild type individuals from  
266 neighboring sites into the trial site. Immigration, in this case, will confound efforts to  
267 measure GEM invasiveness and could potentially render the gene drive inefficient or  
268 even ineffective. Island biogeography theory predicts that choosing a remote island as  
269 an initial field trial site greatly reduces the potential for gene flow between vector  
270 populations both into and out of the island site. This is further supported by the results of  
271 our population genomics assessment, as discussed below.

272 We evaluated geographic isolation for all candidate islands using distance to  
273 mainland, UNEP Isolation Index, and SLMP (Table 1). We excluded any island with a  
274 UNEP Isolation Index of less than 15 and we used a Surrounding Landmass Proportion  
275 (SLMP) value of 1 as a cutoff, so islands with an SLMP value  $>1$  were considered  
276 unacceptable. Sites considered unacceptable based on these criteria include the  
277 Bijago Islands, Bugala, Koome, Mfangano, Pemba, Zanzibar, and Mafia.

### 278 **(c) Island size and topography**

279 There are no well-defined criteria to guide decisions with respect to an  
280 appropriately sized area for a GEM field trial. One important consideration is mosquito

281 flight range. To evaluate the dispersal capacity of a GEM, the site should exceed the  
282 flight range of the target species. For our considerations we assumed a maximal daily  
283 flight range of 10 km for *A. gambiae* [69]. Generally, we aimed to identify sites small  
284 enough to be manageable, but large enough to be convincing, keeping the following  
285 considerations as a guide.

286 Area (km<sup>2</sup>) is an important parameter influencing the biology of populations residing  
287 on an island. Large island areas typically include more habitat types and can support  
288 larger populations. This characteristic can increase the rate of speciation and lower  
289 extinction rates over time [27]. Using island size as a criterion we exclude the islands of  
290 Annobón and Île Europa for being too small and Madagascar for being too large.

291 Evaluating the dispersal capabilities of a GEM is a critical outcome from a field trial.  
292 This capacity is best evaluated at a site that possess topographical features that may  
293 pose a challenge to dispersal, as would be encountered in continental Africa.  
294 Elevation was used as a measure of topographic complexity and as a proxy for  
295 environmental heterogeneity. The difference between the elevation maximum and  
296 minimum of each island measured from sea level is reported in the "Elevation" column  
297 in Table 1. Elevation relates to the number of available habitats because of differences  
298 between windward and leeward sites, temperature decrease with altitude, and high  
299 precipitation regimes at certain altitudes [28].

300 Altitude and magnitude of steepest gradient were used to generate a graphic  
301 representation of topography for each island. A representative sample of these



302 analyses for the islands of Grande Comore and São Tomé are presented in  
303 Supplemental Figure 1A and B to illustrate sites having a complex topography and for  
304 the islands of Zanzibar and Mafia in Supplemental Figure 1C and D to illustrate a lack of  
305 topographic complexity. Sites lacking topographic complexity were excluded from  
306 consideration, these included the Bijago Islands, the islands in Lake Victoria, Zanzibar,  
307 Pemba, Mafia and Ile Europa.

#### 308 **(d) Genetic isolation**

309 Genetic isolation relates to the level of gene flow between populations and may be  
310 inferred by measuring the degree of genetic divergence between populations under  
311 the assumption that gene flow reduces genetic divergence.

312 Single nucleotide polymorphism (SNP) data were analyzed to reveal genetic  
313 relationships among populations and results were visualized using principal components  
314 analysis (PCA). The position of individuals in the space defined by the principal  
315 components can be interpreted as revealing levels of genetic similarity/dissimilarity  
316 among the populations from which those individuals were sampled. Populations  
317 occupying the same space are presumed to be very similar genetically and those  
318 widely separated, very different.

319 Results of the PCA for *A. gambiae* populations are illustrated in Figure 3A. This  
320 analysis reveals a high degree of genetic similarity between mainland and both  
321 lacustrine and continental islands. Conversely, oceanic islands (Comoros archipelago

322 and Madagascar) form discrete individual clusters, indicating that they are genetically  
323 distinct both from the mainland and from each other.

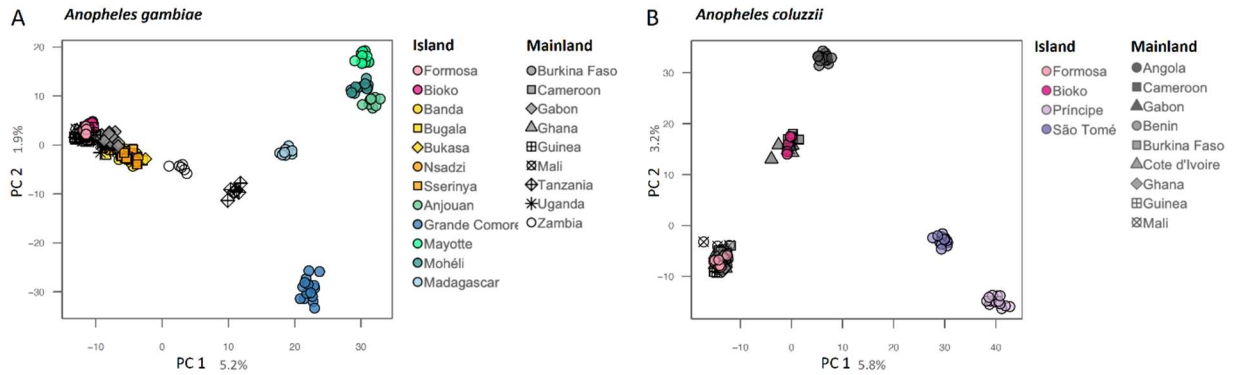

324  
325 **Figure 3.** Population structure analysis by PCA. 2D-plot of *A. gambiae* (A) and *A. coluzzii*  
326 (B) from islands and mainland populations across Africa. Analyses were based on  
327 50,000 biallelic SNPs from euchromatic regions on chromosome 3. Each marker  
328 represents one individual mosquito. Geographic location for each site and numbers of  
329 genome analysed per site are provided in Figure 2.

330

331 Results of the PCA for *A. coluzzii* (Figure 3B) confirm that populations on continental  
332 islands form tight clusters that include mainland populations. Oceanic islands form  
333 discrete clusters indicating genetic divergence from mainland populations and from  
334 each other. These results indicate high levels of genetic isolation for oceanic island  
335 populations of both *A. coluzzii* and *A. gambiae*.

336 The extent to which individuals move (migrate) between two populations can be  
337 approximated by measuring the level of genetic divergence between those  
338 populations. Migration ( $m$ ) can be thought of as including the genotypes of the  
339 individuals doing the moving and, in this context, migration results in gene flow. Genetic  
340 divergence can be described using the statistic  $F_{ST}$ , which is the genetic variance in a

341 subpopulation (S) relative to the total variance (T).  $F_{ST}$  values range between 0 and 1  
342 and are higher when populations are considerably diverged. The relationship between  
343  $F_{ST}$  and  $m$  is complex, but excluding the effects of drift and selection, the more gene  
344 flow between two populations the lower the  $F_{ST}$  value. All pairwise  $F_{ST}$  values for the  
345 populations of *A. gambiae* and *A. coluzzii* analyzed in this study (Figure 2) are  
346 presented in Supplemental Figure 2.

347 Pairwise  $F_{ST}$  values for 14 populations of *A. gambiae* spanning its range across sub-  
348 Saharan Africa are provided in Supplemental Figure 2A. Results are consistent with the  
349 PCA (Figure 3A). West-central populations, including the island of Formosa in the Bijago  
350 archipelago, are very similar ( $F_{ST}=0.000-0.009$ ). Divergence between Bioko island and  
351 the nearest mainland in Cameroon is higher ( $F_{ST}=0.036$ ). The pattern is quite different in  
352 east Africa, wherein mainland populations are far more diverged ( $F_{ST}=0.033-0.090$ ).  
353 Divergence between the islands in Lake Victoria and the nearest mainland in Uganda  
354 are lower ( $F_{ST}=0.003-0.029$ ). Considerably higher divergence is observed between the  
355 Comoros islands and the nearest mainland populations in Tanzania ( $F_{ST} = 0.130-0.169$ )  
356 and between the Comoros and Madagascar ( $F_{ST}=0.126-0.196$ ).

357 The  $F_{ST}$  values for populations of *A. coluzzii* are likewise consistent with the PCA  
358 (Figure 3B). Divergence between the continental island of Formosa and the nearest  
359 mainland populations in Guinea-Bissau and between the island of Bioko and nearest  
360 sites in Cameroon are low ( $F_{ST}=0.015$  and  $0.022$  respectively). Populations of *A. coluzzii*  
361 on the oceanic islands of São Tomé and Príncipe were, by far, the most genetically  
362 isolated from mainland populations ( $F_{ST}=0.144$  and  $0.199$  respectively). In addition, the

363 two islands were highly diverged from each other ( $F_{ST}=0.130$ ). The islands within Lake  
364 Victoria were excluded from consideration because the *A. gambiae* populations  
365 residing on them lacked the high level of divergence that would indicate genetic  
366 isolation. No genetic data was available for the Canary Islands, Cape Verde, Zanzibar,  
367 Pemba, Mafia, Mauritius, Réunion or Ile Europa.

368 Taken together, the data summarized in Figures 4 and Supplemental Figure 2 reveal  
369 a high degree of genetic isolation among oceanic islands compared with either  
370 continental or lacustrine islands. These results suggest limited dispersal (gene flow)  
371 between islands and nearest landmasses and are consistent with expectations based  
372 on island biogeography theory as described above and reinforce the benefits of  
373 selecting a contained island site for conducting GEM field trials. Genetic data is not  
374 currently available for several potential island sites, including the Canary Islands, Cape  
375 Verde, Île Europa, Zanzibar, Pemba, and Mafia. Genetic isolation, as measured here,  
376 was deemed inadequate for the Lake Victoria islands (Bugala, Koome, Mfangano, and  
377 Ukara).

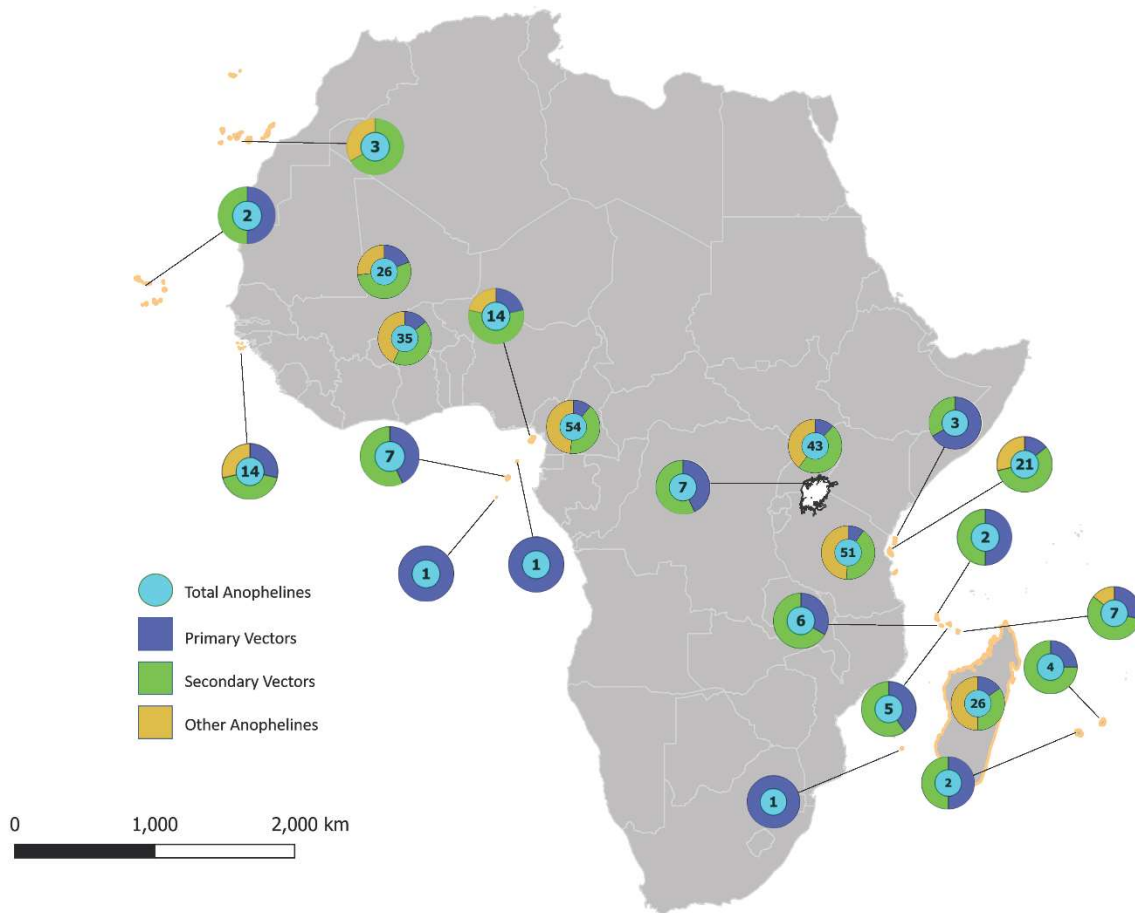

378

379 **Figure 4.** *Anopheles* species complexity in Africa including island and select mainland  
380 sites. Map locations and summary of data presented in Table 2. Cyan circle = total  
381 number of *Anopheles* spp.; blue proportion of primary vector species; green =  
382 proportion of secondary vectors; yellow = proportion of species identified as non-vector  
383 or for which vector status unknown.

384

### 385 (e) Anthropogenic dispersal

386 Anthropogenic dispersal of mosquitoes from inside the release site into nontarget  
387 populations may occur and should be considered in selecting a field trial site. The level  
388 of genetic divergence between island and mainland populations of *A. coluzzii* and *A.*

389 *gambiae* is generally high suggesting that dispersal off the islands is low. Nonetheless,  
390 dispersal that may occur is most likely to rely on anthropogenic conveyance [68, 70].

391 The most significant source of passive anthropogenic dispersal of mosquitoes is by  
392 rail and road. This poses significant risk for mainland field sites, where extensive in-  
393 country and trans-boundary connections exist [71-73]. Risk by this mode of mosquito  
394 dispersal is reduced to zero for oceanic island test sites.

395 Frequency of air and sea departure to interim and final destinations for a sample of  
396 mainland and island populations is presented in Figure 5 and Supplemental Tables 3  
397 and 4. Islands, due to their smaller human populations and geographic areas generally  
398 originate less trans-boundary air and sea traffic compared with the continent (Figure  
399 5A). This results in remote islands having inherently lower risk levels for these modes of  
400 anthropogenic dispersal. A notable exception is the Cape Verde archipelago which  
401 has relatively high ship travel due to its location as a major refueling site (Figure 5B).  
402 Traffic has increased with the completion of two new ports and upgrades to existing  
403 ports in 1997. Airline and shipping traffic data were only obtained for the locations  
404 shown in Figure 5, therefore assessment of the potential for anthropogenic dispersal for  
405 the majority of island sites was not assessed. Results for São Tomé and Príncipe and for  
406 the Comoros suggest that the likelihood of mosquitoes migrating into or out of these  
407 islands is minimal.

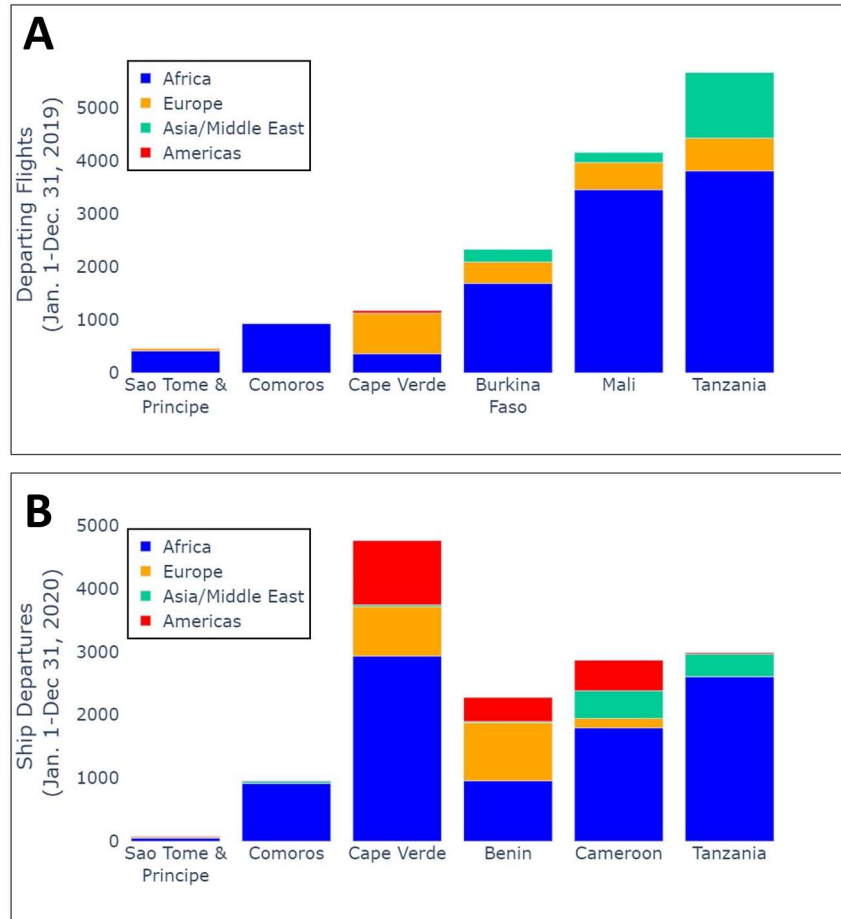

408

409 **Figure 5.** Annual departures by air (A) and sea (B) from representative island and  
410 mainland locations in Africa. Colors indicate destinations, grouped by geographic  
411 region. Air traffic data provided by Cirium\*. (\*This information has been extracted from a  
412 Cirium product. Cirium has not seen or reviewed any conclusions, recommendations or other  
413 views that may appear in this document. Cirium makes no warranties, express or implied, as to  
414 the accuracy, adequacy, timeliness, or completeness of its data or its fitness for any particular  
415 purpose. Cirium disclaims any and all liability relating to or arising out of use of its data and other  
416 content or to the fullest extent permissible by law.) Sea traffic data provided by the  
417 MarineTraffic Global Ship Tracking Intelligence database.

418

#### 419 (f) Anopheline species richness

420 The number of primary, secondary and other (malaria vector status unclear) species  
421 present in island sites and select locations on the mainland are illustrated in Figure 4

422 (and Supplemental Table 2). It is generally agreed that potential field sites with the  
423 fewest number of non-target *Anopheles* species are desirable [16, 74]. If multiple sister  
424 species are present, there exists the possibility that the transgene will move between  
425 species via natural hybridization [75, 76] which could add an additional level of  
426 complexity to post-release assessments. Although the movement of transgene elements  
427 between malaria vector species may be considered desirable, it raises the specter of  
428 horizontal transfer, which is generally identified as a risk to this technology [77].

429       Assessment of entomological endpoints following a GEM release requires repeated  
430 mosquito collections to quantify changes in the ratio of GEM to wild type mosquitoes.  
431 This necessitates sorting large numbers of individual field-collected mosquito samples to  
432 separate target from non-target species. For members of sibling species complexes,  
433 which are morphologically indistinguishable, this requires the application of PCR-based  
434 diagnostics to each individual specimen. If collections include larvae, time-consuming  
435 microscopic examination to identify species is required even for those species  
436 distinguishable morphologically in the adult stage. Logistically these procedures are  
437 greatly simplified where fewer non-target *Anopheles* species are present, positively  
438 impacting the time and resources required for successful assessment.

439       Although entomological endpoints are the main consideration in evaluating the  
440 outcome of a PHASE 2 trial, epidemiological impacts should be considered where  
441 feasible. If epidemiological endpoints are to be assessed, the presence of multiple  
442 primary and secondary vectors are problematic as they can lengthen the season of  
443 malaria transmission [78]. Therefore, their presence can mask the effects that GEMs



444 might have on transmission at a field site by maintaining the rate of transmission, even if  
445 the parasite is not present in the target mosquito species. If a site is selected in which  
446 very few malaria vector species occur, it becomes more likely that the GEM release will  
447 have a measurable impact on the level of malaria transmission.

448 The number of anopheline species present in the mainland sites included here  
449 ranged from 26-54. Continental sites (Bijago Islands, Bioko and Zanzibar) had between  
450 14 and 21 species. As expected, oceanic islands contained far fewer, ranging from 1 to  
451 7 species. These results favor the selection of the oceanic islands, São Tomé and  
452 Príncipe, Annobón and the Comoros, for field trials. The oceanic islands including the  
453 Canary Islands, Cape Verde, Mauritius and Reunion likewise had low numbers of  
454 anopheline species, but these were excluded because our target species *A. coluzzii*  
455 and *A. gambiae* are absent from these islands.

#### 456 **(g) Genetic complexity**

457 Genetic complexity was measured using the nucleotide diversity statistic ( $\pi$ ),  
458 defined as the average number of pairwise nucleotide differences per nucleotide site.  
459 Mean nucleotide diversities ( $\pi$ ) on oceanic islands (*A. gambiae*- 0.80%, *A. coluzzii*-  
460 0.88%) were significantly lower ( $p < 0.0001$ ) than mainland population means (*A.*  
461 *gambiae*- 1.17%, *A. coluzzii*- 1.11%) for both species (Figure 6A and B).

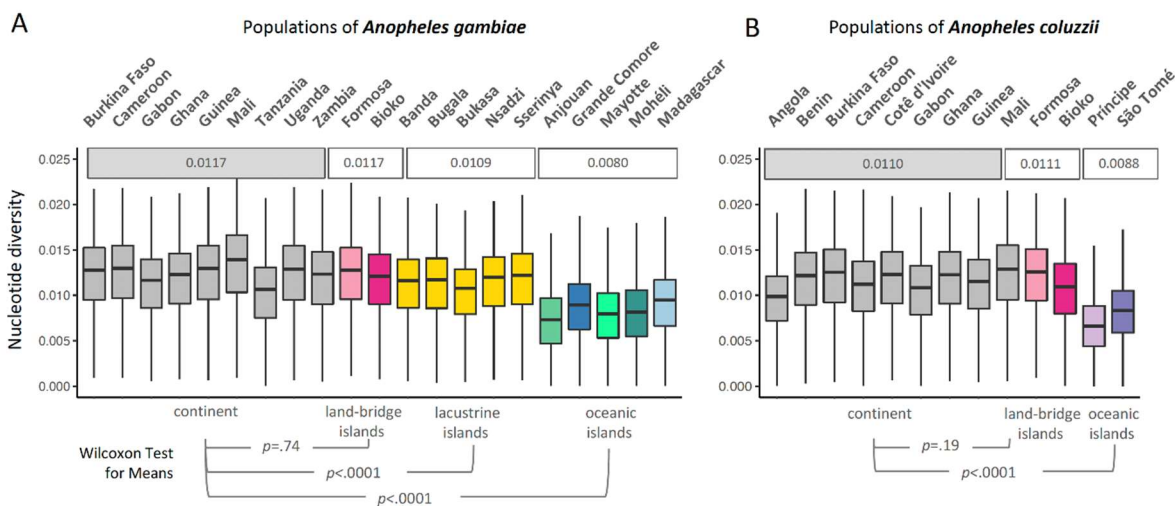

462  
 463 **Figure 6.** Population diversity. Metric is grouped by sampling locations of (A) *A.*  
 464 *gambiae* and (B) *A. coluzzii* populations from island and mainland (grey boxplots).  
 465 Boxplot of nucleotide diversity ( $\pi$ ) performed in 10 kb windows of euchromatic regions  
 466 of chromosome 3. The midline in all boxplots represents the median, with upper (75th  
 467 percentile) and lower (25th percentile) limits, whiskers show maximum and minimum  
 468 values, and outliers are not shown. Mean nucleotide diversity for set of populations are  
 469 shown above the boxplots; *A. gambiae* populations were divided into four groups:  
 470 mainland continental (grey), land-bridge (pink), lacustrine (yellow) and oceanic  
 471 (green/blue) islands; *A. coluzzii* in three: mainland continental (grey), land-bridge (pink)  
 472 and oceanic (blue) islands. P-value for testing of means between islands and mainland  
 473 are shown below. Geographic location for each site and numbers of genome analysed  
 474 per site are provided in Figure 2.

475

476 Comparisons among island types yielded results that were consistent with island  
 477 biogeography theory. Nucleotide diversity in continental island populations did not  
 478 differ from mainland populations, and lacustrine islands had only slightly lower, but  
 479 statistically significant, values for  $\pi$ . These observations are expected given the geologic  
 480 history and proximity of continental and lacustrine islands to the coast. Anjouan island  
 481 populations presented the lowest (0.73%) nucleotide diversity ( $\pi$ ) for *A. gambiae* and

482 Príncipe island for *A. coluzzii* (0.66%), likely due their small size and high degree of  
483 isolation.

484 In general, the lower biocomplexity on isolated islands includes reduced genetic  
485 variation [24]. Our results are concordant with this observation (Figure 6). Selecting field  
486 sites with populations containing the lowest levels of variation should decrease the  
487 potential for transgene/genome interactions that might negatively impact GEM  
488 performance. These include São Tomé and Príncipe and the Comoros.

#### 489 **(h) Selection of candidate field sites**

490 Each potential site was evaluated based on the criteria listed in Box 1. Evaluations  
491 were based on information available from the literature or calculated by us as  
492 summarized in the narrative above. Sites that fail to meet all primary criteria were  
493 eliminated from further consideration. Those sites that met all primary criteria were  
494 raised from potential status to candidate status. Some criteria require further analysis or  
495 site visits before a final evaluation can be completed. Sites visits are recommended for  
496 candidate sites only. Evaluation of insecticide resistance should be conducted during  
497 site visits. Security at candidate sites is dynamic and should be evaluated regularly  
498 before and during trials. Evaluation of potential impacts on endangered species  
499 requires knowledge about the extent to which these overlap ecologically with *A.*  
500 *coluzzii* and/or *A. gambiae* which can only be thoroughly evaluated by mosquito  
501 collections made during early site visits.

502 Overall evaluations are presented in Box 2.

| <b>BOX 2.</b> Overall summary of evaluation of potential island sites. ✓ =site meets criterion; x=site fails to meet criterion; - = data not available; * = to be determined when site is visited. |                                |                      |                   |                   |             |            |                             |                        |                       |                    |                    |
|----------------------------------------------------------------------------------------------------------------------------------------------------------------------------------------------------|--------------------------------|----------------------|-------------------|-------------------|-------------|------------|-----------------------------|------------------------|-----------------------|--------------------|--------------------|
| ISLAND                                                                                                                                                                                             | Primary criteria               |                      |                   |                   |             |            |                             | Other considerations   |                       |                    |                    |
|                                                                                                                                                                                                    | A. coluzzii/A. gambiae present | Geographic isolation | Genetic isolation | Genetic diversity | Size (area) | Topography | Anopheline species richness | Insecticide resistance | Plasmodium prevalence | Endangered species | Travel feasibility |
| <b>OCEANIC ISLANDS</b>                                                                                                                                                                             |                                |                      |                   |                   |             |            |                             |                        |                       |                    |                    |
| Canary Islands                                                                                                                                                                                     | X                              | ✓                    | -                 | -                 | ✓           | ✓          | ✓                           | *                      | X                     | *                  | ✓                  |
| Cape Verde                                                                                                                                                                                         | X                              | ✓                    | -                 | -                 | ✓           | ✓          | ✓                           | *                      | X                     | *                  | ✓                  |
| Annobón                                                                                                                                                                                            | ✓                              | ✓                    | ✓                 | -                 | X           | ✓          | ✓                           | *                      | ✓                     | *                  | X                  |
| São Tomé                                                                                                                                                                                           | ✓                              | ✓                    | ✓                 | ✓                 | ✓           | ✓          | ✓                           | *                      | ✓                     | *                  | ✓                  |
| Príncipe                                                                                                                                                                                           | ✓                              | ✓                    | ✓                 | ✓                 | ✓           | ✓          | ✓                           | *                      | ✓                     | *                  | ✓                  |
| Grand Comore                                                                                                                                                                                       | ✓                              | ✓                    | ✓                 | ✓                 | ✓           | ✓          | ✓                           | *                      | ✓                     | *                  | ✓                  |
| Moheli                                                                                                                                                                                             | ✓                              | ✓                    | ✓                 | ✓                 | ✓           | ✓          | ✓                           | *                      | ✓                     | *                  | ✓                  |
| Anjouan                                                                                                                                                                                            | ✓                              | ✓                    | ✓                 | ✓                 | ✓           | ✓          | ✓                           | *                      | ✓                     | *                  | ✓                  |
| Mayotte                                                                                                                                                                                            | ✓                              | ✓                    | ✓                 | ✓                 | ✓           | ✓          | ✓                           | *                      | ✓                     | *                  | ✓                  |
| Ile Europa                                                                                                                                                                                         | -                              | ✓                    | -                 | -                 | X           | X          | ✓                           | *                      | -                     | *                  | X                  |
| Madagascar                                                                                                                                                                                         | ✓                              | ✓                    | ✓                 | ✓                 | X           | ✓          | X                           | *                      | ✓                     | *                  | ✓                  |
| Mauritius                                                                                                                                                                                          | X                              | ✓                    | -                 | -                 | ✓           | ✓          | ✓                           | *                      | X                     | *                  | ✓                  |
| Réunion                                                                                                                                                                                            | X                              | ✓                    | -                 | -                 | ✓           | ✓          | ✓                           | *                      | X                     | *                  | ✓                  |
| <b>CONTINENTAL ISLANDS</b>                                                                                                                                                                         |                                |                      |                   |                   |             |            |                             |                        |                       |                    |                    |
| Bijagos                                                                                                                                                                                            | ✓                              | X                    | ✓                 | X                 | ✓           | X          | X                           | *                      | ✓                     | *                  | ✓                  |
| Bioko                                                                                                                                                                                              | ✓                              | ✓                    | ✓                 | -                 | ✓           | ✓          | X                           | *                      | ✓                     | *                  | ✓                  |
| Zanzibar                                                                                                                                                                                           | ✓                              | X                    | -                 | -                 | ✓           | X          | X                           | *                      | ✓                     | *                  | ✓                  |
| Pemba                                                                                                                                                                                              | ✓                              | X                    | -                 | -                 | ✓           | X          | ✓                           | *                      | ✓                     | *                  | ✓                  |
| Mafia                                                                                                                                                                                              | ✓                              | X                    | -                 | -                 | ✓           | X          | -                           | *                      | ✓                     | *                  | ✓                  |
| <b>LACUSTRINE ISLANDS (Lake Victoria)</b>                                                                                                                                                          |                                |                      |                   |                   |             |            |                             |                        |                       |                    |                    |
| Bugala                                                                                                                                                                                             | ✓                              | X                    | X                 | X                 | ✓           | X          | ✓                           | *                      | ✓                     | *                  | ✓                  |
| Koome                                                                                                                                                                                              | ✓                              | X                    | X                 | X                 | ✓           | X          | ✓                           | *                      | ✓                     | *                  | ✓                  |
| Mfangano                                                                                                                                                                                           | ✓                              | X                    | X                 | X                 | ✓           | X          | ✓                           | *                      | ✓                     | *                  | ✓                  |
| Ukara                                                                                                                                                                                              | ✓                              | X                    | X                 | X                 | ✓           | X          | ✓                           | *                      | ✓                     | *                  | ✓                  |

503 Evaluation of all twenty-two potential field sites indicate that Bioko, São Tomé &  
504 Príncipe, and the Comoros Islands (Anjouan, Grand Comore, Mayotte and Moheli) can  
505 be elevated from “potential” to “candidate” GEM field trial sites. The Mascarene  
506 (Mauritius and Réunion) and Cape Verde Islands fit many criteria, but *Anopheles*  
507 *gambiae* does not occur in these islands. Annobón scores well based on several our  
508 criteria but travel there was determined to be infeasible, and the island was deemed  
509 too small to represent a trial which would provide compelling outcomes.

510 Therefore, we propose the following as the lead candidate sites for a PHASE 2 GEM  
511 field trial: the Comoros Islands, São Tomé and Príncipe and Bioko.

512

#### 513 **4. Conclusions**

514 Our early decision to consider physical islands as the ideal sites for a GEM field trial was  
515 guided by contemporary island biogeography theory. This theory provides the basis for  
516 certain expectations concerning species richness, in our case, anopheline species  
517 richness and also features such as genetic isolation and variability. Our results confirm  
518 the relationships between geographic isolation and both genetic isolation (pairwise  $F_{ST}$   
519 values) and genetic diversity (nucleotide diversity,  $\pi$ ) which are significantly correlated  
520 (Supplemental Figure 3).

521 The framework described here has been applied by the University of California Irvine  
522 Malaria Initiative (UCIMI) as they enter PHASE 2 of GEM research. It is our belief that this  
523 comprehensive framework provides identification of site(s) that will maximize the

524 prospect for success, minimize risk, and will serve as a fair, valid, and convincing test of  
525 the efficacy and impacts of the UCIMI GEM product, meeting the goal of a PHASE 2  
526 field trial. Furthermore, this process provides a well-reasoned, science-based justification  
527 for selecting these sites for GEM field trials, and a solid foundation on which to  
528 approach ethical, social, and legal considerations with field site stakeholders.

529

## 530 **References**

- 531 1. Carballar-Lejarazú, R., & James, A. A. (2017). Population modification of Anopheline species to  
532 control malaria transmission. *Pathog Glob Health*, *111*(8), 424-435.  
533 doi:10.1080/20477724.2018.1427192
- 534 2. Isaacs, A. T., Jasinskiene, N., Tretiakov, M., Thiery, I., Zettor, A., Bourgooin, C., & James, A. A.  
535 (2012). Transgenic Anopheles stephensi coexpressing single-chain antibodies resist Plasmodium  
536 falciparum development. *Proc Natl Acad Sci U S A*, *109*(28), E1922-1930. Retrieved from  
537 <https://www.ncbi.nlm.nih.gov/pubmed/22689959>. doi:10.1073/pnas.1207738109
- 538 3. Carballar-Lejarazú, R., Ogaugwu, C., Tushar, T., Kelsey, A., Pham, T. B., Murphy, J., Schmidt, H.,  
539 Lee, Y., et al. (2020). Next-generation gene drive for population modification of the malaria  
540 vector mosquito, *Anopheles gambiae*. *Proceedings of the National Academy of*  
541 *Sciences*, *117*(37), 22805-22814. Retrieved from  
542 <https://www.pnas.org/content/pnas/117/37/22805.full.pdf>. doi:10.1073/pnas.2010214117
- 543 4. WHO/TDR and FNIH. (2014). *The Guidance Framework for testing genetically modified*  
544 *mosquitoes* [Framework]. Retrieved from  
545 [https://www.who.int/tdr/publications/year/2014/Guidance\\_framework\\_mosquitoes.pdf](https://www.who.int/tdr/publications/year/2014/Guidance_framework_mosquitoes.pdf)
- 546 5. African Union and NEPAD. (2018). *Gene Drives for Malaria Control and Elimination in Africa*.  
547 Retrieved from [https://www.nepad.org/publication/gene-drives-malaria-control-and-](https://www.nepad.org/publication/gene-drives-malaria-control-and-elimination-africa)  
548 [elimination-africa](https://www.nepad.org/publication/gene-drives-malaria-control-and-elimination-africa)
- 549 6. National Academies of Sciences Engineering and Medicine. (2016). *Gene Drives on the Horizon:*  
550 *Advancing Science, Navigating Uncertainty, and Aligning Research with Public Values*.  
551 Washington, DC: The National Academies Press.
- 552 7. Hammond, A., Galizi, R., Kyrou, K., Simoni, A., Siniscalchi, C., Katsanos, D., Gribble, M., Baker, D.,  
553 et al. (2016). A CRISPR-Cas9 gene drive system targeting female reproduction in the malaria  
554 mosquito vector *Anopheles gambiae*. *Nature Biotechnology*, *34*(1), 78-83. Retrieved from  
555 <https://www.ncbi.nlm.nih.gov/pubmed/26641531>. doi:10.1038/nbt.3439

- 556 8. Alphey, L., Beard, C. B., Billingsley, P., Coetzee, M., Crisanti, A., Curtis, C., Eggleston, P., Godfray,  
557 C., et al. (2002). Malaria control with genetically manipulated insect vectors. *Science*, 298(5591),  
558 119-121. Retrieved from <https://www.ncbi.nlm.nih.gov/pubmed/12364786>.  
559 doi:10.1126/science.1078278
- 560 9. Benedict, M., D'Abbs, P., Dobson, S., Gottlieb, M., Harrington, L., Higgs, S., James, A., James, S.,  
561 et al. (2008). Guidance for contained field trials of vector mosquitoes engineered to contain a  
562 gene drive system: recommendations of a scientific working group. *Vector Borne and Zoonotic*  
563 *Diseases*, 8(2), 127-166. Retrieved from <https://www.ncbi.nlm.nih.gov/pubmed/18452399>.  
564 doi:10.1089/vbz.2007.0273
- 565 10. Facchinelli, L., Valerio, L., Ramsey, J. M., Gould, F., Walsh, R. K., Bond, G., Robert, M. A., Lloyd, A.  
566 L., et al. (2013). Field cage studies and progressive evaluation of genetically-engineered  
567 mosquitoes. *PLoS Negl Trop Dis*, 7(1), e2001. Retrieved from  
568 <https://www.ncbi.nlm.nih.gov/pubmed/23350003>. doi:10.1371/journal.pntd.0002001
- 569 11. Scott, T. W., Takken, W., Knols, B. G., & Boete, C. (2002). The ecology of genetically modified  
570 mosquitoes. *Science*, 298(5591), 117-119. Retrieved from  
571 <https://www.ncbi.nlm.nih.gov/pubmed/12364785>. doi:10.1126/science.298.5591.117
- 572 12. Carpenter, S. R. (1996). Microcosm Experiments have Limited Relevance for Community and  
573 Ecosystem Ecology. *Ecology*, 77(3), 677-680. Retrieved from  
574 <http://www.jstor.org/stable/2265490>. doi:10.2307/2265490
- 575 13. Wynn, G., & Paradise, C. J. (2001). Effects of microcosm scaling and food resources on growth  
576 and survival of larval *Culex pipiens*. *BMC Ecology*, 1, 3. Retrieved from  
577 <https://www.ncbi.nlm.nih.gov/pubmed/11527507>. doi:10.1186/1472-6785-1-3
- 578 14. Schindler, D. W. (1998). Whole-Ecosystem Experiments: Replication Versus Realism: The Need  
579 for Ecosystem-Scale Experiments. *Ecosystems*, 1(4), 323-334. Retrieved from  
580 <https://doi.org/10.1007/s100219900026>. doi:10.1007/s100219900026
- 581 15. James, S., Collins, F. H., Welkhoff, P. A., Emerson, C., Godfray, H. C. J., Gottlieb, M., Greenwood,  
582 B., Lindsay, S. W., et al. (2018). Pathway to Deployment of Gene Drive Mosquitoes as a Potential  
583 Biocontrol Tool for Elimination of Malaria in Sub-Saharan Africa: Recommendations of a  
584 Scientific Working Group(dagger). *American Journal of Tropical Medicine and Hygiene*,  
585 98(6\_Suppl), 1-49. Retrieved from <https://www.ncbi.nlm.nih.gov/pubmed/29882508>.  
586 doi:10.4269/ajtmh.18-0083
- 587 16. James, S. L., Marshall, J. M., Christophides, G. K., Okumu, F. O., & Nolan, T. (2020). Toward the  
588 Definition of Efficacy and Safety Criteria for Advancing Gene Drive-Modified Mosquitoes to Field  
589 Testing. *Vector Borne and Zoonotic Diseases*, 20(4), 237-251. Retrieved from  
590 <https://www.ncbi.nlm.nih.gov/pubmed/32155390>. doi:10.1089/vbz.2019.2606
- 591 17. Cisnetto, V., & Barlow, J. (2020). The development of complex and controversial innovations.  
592 Genetically modified mosquitoes for malaria eradication. *Research Policy*, 49(3), 103917.



- 593 Retrieved from <https://www.sciencedirect.com/science/article/pii/S0048733319302355>.  
594 doi:<https://doi.org/10.1016/j.respol.2019.103917>
- 595 18. Nash, A., Urdaneta, G. M., Beaghton, A. K., Hoermann, A., Papathanos, P. A., Christophides, G.  
596 K., & Windbichler, N. (2019). Integral gene drives for population replacement. *Biol Open*, 8(1).  
597 Retrieved from <https://www.ncbi.nlm.nih.gov/pubmed/30498016>. doi:10.1242/bio.037762
- 598 19. Li, M., Yang, T., Kandul, N. P., Bui, M., Gamez, S., Raban, R., Bennett, J., Sanchez, C. H., et al.  
599 (2020). Development of a confinable gene drive system in the human disease vector *Aedes*  
600 *aegypti*. *Elife*, 9. Retrieved from <https://www.ncbi.nlm.nih.gov/pubmed/31960794>.  
601 doi:10.7554/eLife.51701
- 602 20. Knols, B., & Bossin, H. (2006). Identification and characterization of field sites for genetic control  
603 of disease vectors. In (pp. 203-209).
- 604 21. Kolopack, P. A., & Lavery, J. V. (2017). Informed consent in field trials of gene-drive mosquitoes.  
605 *Gates Open Res*, 1, 14. Retrieved from <https://www.ncbi.nlm.nih.gov/pubmed/29355214>.  
606 doi:10.12688/gatesopenres.12771.1
- 607 22. Neuhaus, C. P. (2018). Community Engagement and Field Trials of Genetically Modified Insects  
608 and Animals. *Hastings Cent Rep*, 48(1), 25-36. Retrieved from  
609 <https://www.ncbi.nlm.nih.gov/pubmed/29457234>. doi:10.1002/hast.808
- 610 23. Resnik, D. B. (2014). Ethical issues in field trials of genetically modified disease-resistant  
611 mosquitoes. *Dev World Bioeth*, 14(1), 37-46. Retrieved from  
612 <https://www.ncbi.nlm.nih.gov/pubmed/23279283>. doi:10.1111/dewb.12011
- 613 24. Frankham, R. (1997). Do island populations have less genetic variation than mainland  
614 populations? *Heredity (Edinb)*, 78 ( Pt 3), 311-327. Retrieved from  
615 <https://www.ncbi.nlm.nih.gov/pubmed/9119706>. doi:10.1038/hdy.1997.46
- 616 25. Losos, J. B., & Ricklefs, R. E. (2009). Adaptation and diversification on islands. *Nature*, 457(7231),  
617 830-836. Retrieved from <https://www.ncbi.nlm.nih.gov/pubmed/19212401>.  
618 doi:10.1038/nature07893
- 619 26. MacArthur, R. H., & Wilson, E. O. (1967). *The theory of island biogeography*. Princeton, N.J.,:  
620 Princeton University Press.
- 621 27. Santos, A. M. C., Field, R., & Ricklefs, R. E. (2016). New directions in island biogeography. *Global*  
622 *Ecology and Biogeography*, 25(7), 751-768. Retrieved from  
623 <https://onlinelibrary.wiley.com/doi/abs/10.1111/geb.12477>.  
624 doi:<https://doi.org/10.1111/geb.12477>
- 625 28. Weigelt, P., Jetz, W., & Kreft, H. (2013). Bioclimatic and physical characterization of the world's  
626 islands. *Proceedings of the National Academy of Sciences*, 110(38), 15307-15312. Retrieved from  
627 <https://www.pnas.org/content/pnas/110/38/15307.full.pdf>. doi:10.1073/pnas.1306309110
- 628 29. Itescu, Y., Foufopoulos, J., Pafilis, P., & Meiri, S. (2020). The diverse nature of island isolation and  
629 its effect on land bridge insular faunas. *Global Ecology and Biogeography*, 29(2), 262-280.



- 630 Retrieved from <https://onlinelibrary.wiley.com/doi/abs/10.1111/geb.13024>.  
631 doi:<https://doi.org/10.1111/geb.13024>
- 632 30. Kayondo, J. K., Mukwaya, L. G., Stump, A., Michel, A. P., Coulibaly, M. B., Besansky, N. J., &  
633 Collins, F. H. (2005). Genetic structure of *Anopheles gambiae* populations on islands in  
634 northwestern Lake Victoria, Uganda. *Malar J*, 4, 59. Retrieved from  
635 <https://www.ncbi.nlm.nih.gov/pubmed/16336684>. doi:10.1186/1475-2875-4-59
- 636 31. Nambuya A, S. C., Nkwiine C, Wetala P. (2013, 20–25 October 2013). *Abundance and ecological*  
637 *functional categories of soil macrofauna as indicators of soil chemical properties status in oil*  
638 *palm plantations in Bugala island Kalangala District, Uganda*. Paper presented at the Joint  
639 Proceedings of 27th Soil Science Society of East Africa & 6th African Soil Science Society, Nakuru,  
640 Kenya.
- 641 32. Ssegawa, P., & Nkuutu, D. N. (2006). Diversity of vascular plants on Ssesse islands in Lake Victoria,  
642 central Uganda. *African Journal of Ecology*, 44(1), 22-29. Retrieved from  
643 <https://onlinelibrary.wiley.com/doi/abs/10.1111/j.1365-2028.2006.00609.x>.  
644 doi:<https://doi.org/10.1111/j.1365-2028.2006.00609.x>
- 645 33. Zeemeijer, I. M. (2012). *Who gets What, When and How? New Corporate Land Acquisitions and*  
646 *the Impact on Local Livelihoods in Uganda*. (Master's Thesis), Utrecht University,
- 647 34. Idris, Z. M., Chan, C. W., Kongere, J., Gitaka, J., Logedi, J., Omar, A., Obonyo, C., Machini, B. K., et  
648 al. (2016). High and Heterogeneous Prevalence of Asymptomatic and Sub-microscopic Malaria  
649 Infections on Islands in Lake Victoria, Kenya. *Sci Rep*, 6, 36958. Retrieved from  
650 <https://www.ncbi.nlm.nih.gov/pubmed/27841361>. doi:10.1038/srep36958
- 651 35. Lounio, T. (2014). *Population Dynamics and Livelihood Change on Ukara Island, Lake Victoria*.  
652 (Master's Thesis), University of Helsinki,
- 653 36. Mugono, M., Konje, E., Kuhn, S., Mpogoro, F. J., Morona, D., & Mazigo, H. D. (2014). Intestinal  
654 schistosomiasis and geohelminths of Ukara Island, North-Western Tanzania: prevalence,  
655 intensity of infection and associated risk factors among school children. *Parasit Vectors*, 7, 612.  
656 Retrieved from <https://www.ncbi.nlm.nih.gov/pubmed/25533267>. doi:10.1186/s13071-014-  
657 0612-5
- 658 37. Smith, A. (1955). The Transmission of Bancroftial Filariasis on Ukara Island, Tanganyika. I.—A  
659 Geographical and Ecological Description of the Island with an annotated List of Mosquitos and  
660 other Arthropods of medical Importance. *Bulletin of Entomological Research*, 46(2), 419-436.  
661 Retrieved from [https://www.cambridge.org/core/article/transmission-of-bancroftial-filariasis-  
662 on-ukara-island-tanganyika-ia-geographical-and-ecological-description-of-the-island-with-an-  
663 annotated-list-of-mosquitos-and-other-arthropods-of-medical-  
664 importance/193FF09AACF861834482ACB9CF8AB3D6](https://www.cambridge.org/core/article/transmission-of-bancroftial-filariasis-on-ukara-island-tanganyika-ia-geographical-and-ecological-description-of-the-island-with-an-annotated-list-of-mosquitos-and-other-arthropods-of-medical-importance/193FF09AACF861834482ACB9CF8AB3D6). doi:10.1017/S000748530003100X
- 665 38. BakamaNume, B. B. (2010). *A Contemporary Geography of Uganda*: Mkuki Na Nyota.
- 666 39. Google Earth (Cartographer). Map showing location of Kome Island. Retrieved from  
667 <https://earth.google.com/web/search/Koome+Island,+Uganda/@->

- 668 [0.08724243,32.74244361,1211.47630539a,48380.8541521d,35y,16.3547808h,11.41826421t,Or/](https://doi.org/10.08724243,32.74244361,1211.47630539a,48380.8541521d,35y,16.3547808h,11.41826421t,Or/)  
669 [data=CigiJgokCQxDZ9yeljVAEQtDZ9yeljXAGRf30zaOXUJAIW6hBeDnvlDA](https://doi.org/10.08724243,32.74244361,1211.47630539a,48380.8541521d,35y,16.3547808h,11.41826421t,Or/data=CigiJgokCQxDZ9yeljVAEQtDZ9yeljXAGRf30zaOXUJAIW6hBeDnvlDA)
- 670 40. Jackson, G., & Gartlan, J. S. (1965). The Flora and Fauna of Lolui Island, Lake Victoria: A Study of  
671 Vegetation, Men and Monkeys. *Journal of Ecology*, 53(3), 573-597. Retrieved from  
672 <http://www.jstor.org/stable/2257622>. doi:10.2307/2257622
- 673 41. Nampijja, M., Webb, E. L., Kaweesa, J., Kizindo, R., Namutebi, M., Nakazibwe, E., Oduru, G.,  
674 Kabuubi, P., et al. (2015). The Lake Victoria Island Intervention Study on Worms and Allergy-  
675 related diseases (LaVIISWA): study protocol for a randomised controlled trial. *Trials*, 16, 187.  
676 Retrieved from <https://www.ncbi.nlm.nih.gov/pubmed/25902705>. doi:10.1186/s13063-015-  
677 0702-5
- 678 42. Tuhebwe, D., Bagonza, J., Kiracho, E. E., Yeka, A., Elliott, A. M., & Nuwaha, F. (2015). Uptake of  
679 mass drug administration programme for schistosomiasis control in Koome Islands, Central  
680 Uganda. *PLoS One*, 10(4), e0123673. Retrieved from  
681 <https://www.ncbi.nlm.nih.gov/pubmed/25830917>. doi:10.1371/journal.pone.0123673
- 682 43. Dahl, A. L. (1991). *Island directory* (Prelim. ed.). Nairobi, Kenya: UNEP.
- 683 44. Japan Aerospace Exploration Agency. (2020). *ALOS Global Digital Surface Model (DSM) ALOS*  
684 *World 3D-30m (AW3D30) Version 3.1*. Retrieved from:  
685 [https://www.eorc.jaxa.jp/ALOS/en/aw3d30/aw3d30v31\\_product\\_e\\_a.pdf](https://www.eorc.jaxa.jp/ALOS/en/aw3d30/aw3d30v31_product_e_a.pdf)
- 686 45. Jarvis A., H. I. R., A. Nelson, E. Guevara. (2008). *Hole-filled seamless SRTM data V4*. I. C. f. T. A.  
687 (CIAT). Retrieved from: <https://srtm.csi.cgiar.org/>
- 688 46. Anopheles gambiae 1000 Genomes Consortium. (2020). Genome variation and population  
689 structure among 1142 mosquitoes of the African malaria vector species *Anopheles gambiae* and  
690 *Anopheles coluzzii*. *Genome Research*, 30, 1-14. doi:10.1101/gr.262790.120
- 691 47. Bergey, C. M., Lukindu, M., Wiltshire, R. M., Fontaine, M. C., Kayondo, J. K., & Besansky, N. J.  
692 (2020). Assessing connectivity despite high diversity in island populations of a malaria mosquito.  
693 *Evolutionary Applications*, 13(2), 417-431. Retrieved from  
694 <https://onlinelibrary.wiley.com/doi/abs/10.1111/eva.12878>.  
695 doi:<https://doi.org/10.1111/eva.12878>
- 696 48. Nieman, C. C., Yamasaki, Y., Collier, T. C., & Lee, Y. (2015). A DNA extraction protocol for  
697 improved DNA yield from individual mosquitoes. *F1000Res*, 4, 1314. Retrieved from  
698 <https://www.ncbi.nlm.nih.gov/pubmed/26937269>. doi:10.12688/f1000research.7413.1
- 699 49. Yamasaki, Y. K., Nieman, C. C., Chang, A. N., Collier, T. C., Main, B. J., & Lee, Y. (2016). Improved  
700 tools for genomic DNA library construction of small insects [version 1; not peer reviewed].  
701 *F1000Research*, 5, 211 (poster). Retrieved from  
702 <https://doi.org/10.7490/f1000research.1111322.1>.
- 703 50. Clarkson, C. S., Miles, A., Harding, N. J., O'Reilly, A. O., Weetman, D., Kwiatkowski, D., Donnelly,  
704 M. J., & Anopheles gambiae Genomes, C. (2021). The genetic architecture of target-site  
705 resistance to pyrethroid insecticides in the African malaria vectors *Anopheles gambiae* and

- 706 Anopheles coluzzii. *Molecular Ecology*. Retrieved from  
707 <https://www.ncbi.nlm.nih.gov/pubmed/33590926>. doi:10.1111/mec.15845
- 708 51. Bolger, A. M., Lohse, M., & Usadel, B. (2014). Trimmomatic: a flexible trimmer for Illumina  
709 sequence data. *Bioinformatics*, 30(15), 2114-2120. Retrieved from  
710 <https://www.ncbi.nlm.nih.gov/pubmed/24695404>. doi:10.1093/bioinformatics/btu170
- 711 52. Quinlan, A. R., & Hall, I. M. (2010). BEDTools: a flexible suite of utilities for comparing genomic  
712 features. *Bioinformatics*, 26(6), 841-842. Retrieved from  
713 <https://www.ncbi.nlm.nih.gov/pubmed/20110278>. doi:10.1093/bioinformatics/btq033
- 714 53. Sharakhova, M. V., Hammond, M. P., Lobo, N. F., Krzywinski, J., Unger, M. F., Hillenmeyer, M. E.,  
715 Bruggner, R. V., Birney, E., & Collins, F. H. (2007). Update of the Anopheles gambiae PEST  
716 genome assembly. *Genome Biol*, 8(1), R5. Retrieved from  
717 <https://www.ncbi.nlm.nih.gov/pubmed/17210077>. doi:10.1186/gb-2007-8-1-r5
- 718 54. Holt, R. A., Subramanian, G. M., Halpern, A., Sutton, G. G., Charlab, R., Nusskern, D. R., Wincker,  
719 P., Clark, A. G., et al. (2002). The genome sequence of the malaria mosquito Anopheles gambiae.  
720 *Science*, 298(5591), 129-149. Retrieved from <https://www.ncbi.nlm.nih.gov/pubmed/12364791>.  
721 doi:10.1126/science.1076181
- 722 55. Li, H. (2013). Aligning sequence reads, clone sequences and assembly contigs with BWA-MEM.  
723 *ArXiv*, 1303.
- 724 56. Tarasov, A., Vilella, A. J., Cuppen, E., Nijman, I. J., & Prins, P. (2015). Sambamba: fast processing  
725 of NGS alignment formats. *Bioinformatics*, 31(12), 2032-2034. Retrieved from  
726 <https://www.ncbi.nlm.nih.gov/pubmed/25697820>. doi:10.1093/bioinformatics/btv098
- 727 57. Garrison, E., & Marth, G. (2012). Haplotype-based variant detection from short-read sequencing.  
728 *ArXiv*, 1207.
- 729 58. Tan, A., Abecasis, G. R., & Kang, H. M. (2015). Unified representation of genetic variants.  
730 *Bioinformatics*, 31(13), 2202-2204. Retrieved from  
731 <https://www.ncbi.nlm.nih.gov/pubmed/25701572>. doi:10.1093/bioinformatics/btv112
- 732 59. Miles, A., & Harding, N. (2017). *cggh/scikit-allel: v1.1.8 (Version v1.1.8)*. Zenodo. Retrieved from:  
733 <http://doi.org/10.5281/zenodo.822784>
- 734 60. Hudson, R. R., Slatkin, M., & Maddison, W. P. (1992). Estimation of levels of gene flow from DNA  
735 sequence data. *Genetics*, 132(2), 583-589. Retrieved from  
736 <https://www.ncbi.nlm.nih.gov/pubmed/1427045>.
- 737 61. Bhatia, G., Patterson, N., Sankararaman, S., & Price, A. L. (2013). Estimating and interpreting FST:  
738 the impact of rare variants. *Genome Research*, 23(9), 1514-1521. Retrieved from  
739 <https://www.ncbi.nlm.nih.gov/pubmed/23861382>. doi:10.1101/gr.154831.113
- 740 62. Danecek, P., Auton, A., Abecasis, G., Albers, C. A., Banks, E., DePristo, M. A., Handsaker, R. E.,  
741 Lunter, G., et al. (2011). The variant call format and VCFtools. *Bioinformatics*, 27(15), 2156-2158.  
742 Retrieved from <https://www.ncbi.nlm.nih.gov/pubmed/21653522>.  
743 doi:10.1093/bioinformatics/btr330

- 744 63. LNRS Data Services Inc. (2021). *Q-00223232 Historical Data Export*. Cirium.
- 745 64. Exmile Solutions Ltd. (2021). *Historical AIS data (port calls) for 2019-01-01 to 2019-12-31 for*  
746 *PORT = BJCOO, CMDLA, TZDAR, CVRAI, CVMIN, ZADUR, KMYVA, KMMUT, Fomboni, STTMS,*  
747 *STPCP*. Marine Traffic.
- 748 65. Irish, S. R., Kyalo, D., Snow, R. W., & Coetzee, M. (2020). Updated list of Anopheles species  
749 (Diptera: Culicidae) by country in the Afrotropical Region and associated islands. *Zootaxa*,  
750 *4747(3)*, zootaxa 4747 4743 4741. Retrieved from  
751 <https://www.ncbi.nlm.nih.gov/pubmed/32230095>. doi:10.11646/zootaxa.4747.3.1
- 752 66. Kyalo, D., Amratia, P., Mundia, C. W., Mbogo, C. M., Coetzee, M., & Snow, R. W. (2017). A geo-  
753 coded inventory of anophelines in the Afrotropical Region south of the Sahara: 1898-2016.  
754 *Wellcome Open Res*, *2*, 57. Retrieved from <https://www.ncbi.nlm.nih.gov/pubmed/28884158>.  
755 doi:10.12688/wellcomeopenres.12187.1
- 756 67. Huestis, D., Dao, A., Diallo, M., Sanogo, Z. L., Samake, D., Yaro, A., Ousman, Y., Linton, Y.-M., et  
757 al. (2019). Windborne long-distance migration of malaria mosquitoes in the Sahel. *Nature*.
- 758 68. Service, M. W. (1997). Mosquito (Diptera: Culicidae) dispersal--the long and short of it. *Journal*  
759 *of Medical Entomology*, *34(6)*, 579-588. Retrieved from  
760 <https://www.ncbi.nlm.nih.gov/pubmed/9439109>. doi:10.1093/jmedent/34.6.579
- 761 69. Kaufmann, C., & Briegel, H. (2004). Flight performance of the malaria vectors Anopheles  
762 gambiae and Anopheles atroparvus. *J Vector Ecol*, *29(1)*, 140-153. Retrieved from  
763 <https://www.ncbi.nlm.nih.gov/pubmed/15266751>.
- 764 70. Belkin, J. N. (1962). *The Mosquitoes of the South Pacific: (Diptera, Culicidae)*: University of  
765 California Press.
- 766 71. Campos, E. G., Trevino, H. A., & Strom, L. G. . (1961). The Dispersal of Mosquitoes by Railroad  
767 Trains involved in International Traffic. *Mosquito News*, *21(3)*, 190-192.
- 768 72. Eritja, R., Palmer, J., Roiz, D., Sanpera-Calbet, I., & Bartumeus, F. (2017). Direct Evidence of Adult  
769 Aedes albopictus Dispersal by Car. *Scientific Reports*, *7*, 14399. doi:10.1038/s41598-017-12652-5
- 770 73. Frean, J., Brooke, B., Thomas, J., & Blumberg, L. (2014). Odyssean malaria outbreaks in Gauteng  
771 Province, South Africa, 2007 - 2013. *S Afr Med J*, *104(5)*, 335-338. Retrieved from  
772 <https://www.ncbi.nlm.nih.gov/pubmed/25212198>. doi:10.7196/samj.7684
- 773 74. Brown, D. M., Alphey, L. S., McKemey, A., Beech, C., & James, A. A. (2014). Criteria for  
774 identifying and evaluating candidate sites for open-field trials of genetically engineered  
775 mosquitoes. *Vector Borne and Zoonotic Diseases*, *14(4)*, 291-299. Retrieved from  
776 <https://www.ncbi.nlm.nih.gov/pubmed/24689963>. doi:10.1089/vbz.2013.1364
- 777 75. Lee, Y., Marsden, C. D., Norris, L. C., Collier, T. C., Main, B. J., Fofana, A., Cornel, A. J., & Lanzaro,  
778 G. C. (2013). Spatiotemporal dynamics of gene flow and hybrid fitness between the M and S  
779 forms of the malaria mosquito, Anopheles gambiae. *Proc Natl Acad Sci U S A*, *110(49)*, 19854-  
780 19859. Retrieved from <https://www.ncbi.nlm.nih.gov/pubmed/24248386>.  
781 doi:10.1073/pnas.1316851110

- 782 76. White, G. B. (1971). Chromosomal evidence for natural interspecific hybridization by mosquitoes  
783 of the *Anopheles gambiae* complex. *Nature*, 231(5299), 184-185. Retrieved from  
784 <https://www.ncbi.nlm.nih.gov/pubmed/4930676>. doi:10.1038/231184a0
- 785 77. Courtier-Orgogozo, V., Danchin, A., Gouyon, P. H., & Boete, C. (2020). Evaluating the probability  
786 of CRISPR-based gene drive contaminating another species. *Evol Appl*, 13(8), 1888-1905.  
787 Retrieved from <https://www.ncbi.nlm.nih.gov/pubmed/32908593>. doi:10.1111/eva.12939
- 788 78. Antonio-Nkondjio, C., Kerah, C. H., Simard, F., Awono-Ambene, P., Chouaibou, M., Tchuinkam,  
789 T., & Fontenille, D. (2006). Complexity of the malaria vectorial system in Cameroon: contribution  
790 of secondary vectors to malaria transmission. *Journal of Medical Entomology*, 43(6), 1215-1221.  
791 Retrieved from <https://www.ncbi.nlm.nih.gov/pubmed/17162956>. doi:10.1603/0022-  
792 2585(2006)43[1215:cotmvs]2.0.co;2
- 793
